# Supplementary material for: Improved visible light triggered photocatalytic activities of BiOCl photocatalysts via a synergistic effect of doping and heterojunction engineering
Source: Royal Society of Chemistry journal article supplement (doi:10.1039/d3cp02381h), 2023-01-01
Supplement: d3cp02381h1.pdf [file d3cp02381h1.pdf]

**Improved visible-light triggered photocatalytic activities of BiOCl microplates  
via synergistic effect of doping and heterojunction engineering**

**Qian Wu<sup>a</sup>, Xiaoqing Lai<sup>a</sup>, Xiao-Hui Ji<sup>b</sup>, Hai Jiang<sup>a\*</sup>, Peng Du<sup>a\*</sup>**

*<sup>a</sup>Department of Microelectronic Science and Engineering, School of Physical Science and Technology, Ningbo University, 315211 Ningbo, Zhejiang, China*

*<sup>b</sup>Shaanxi Province Key Laboratory of Catalysis, College of Chemical & Environment Science, Shaanxi University of Technology, Hanzhong 723001, P.R. China*

**Corresponding authors**

**E-mail:** jianghai@nbu.edu.cn (H. Jiang); dp2007good@sina.com or dupeng@nbu.edu.cn (P. Du)

**Preparation of Sm<sup>3+</sup>-doped BiOCl microplates**

Bi<sub>1-x</sub>OCl:xSm<sup>3+</sup> (BiOCl:xSm<sup>3+</sup>; 0 ≤ x ≤ 0.05) microplates were synthesized through high-temperature solid-state reaction method. Herein, Bi<sub>2</sub>O<sub>3</sub>, NH<sub>4</sub>Cl and Sm<sub>2</sub>O<sub>3</sub> were used as the raw materials. These raw materials were weighted according to the stoichiometric ratio. Note that, to make up the loss of volatilization, excess 20% of NH<sub>4</sub>Cl was added. The weighed raw materials were thoroughly mixed for 30 min via an agate mortar. After that, they were sintered at 673 K for 3 hours in a furnace. When the sintering process was finished, white powders were obtained and collected for further characterization.

**Synthesis of g-C<sub>3</sub>N<sub>4</sub>**

To synthesize the g-C<sub>3</sub>N<sub>4</sub>, a conventional high-temperature solid-state reaction method was used. In brief, 2 g of melamine was weighed and placed in a crucible, and then heated at 823 K for 5 h in a furnace. After that, the g-C<sub>3</sub>N<sub>4</sub> was prepared.

**Sample characterization**

X-ray diffractometer (Bruker D8 Advance; Cu K $\alpha$  irradiation), UV-vis spectrophotometer (Cary 5000), field-emission scanning electron microscopy (FE-

SEM, Hitachi SU-70) and a multifunctional imaging electron spectrometer (Thermo ESCALAB 250XI) were utilized to investigate the phase structure, microstructure, light absorption capacity and elemental compositions of final products, respectively. The Raman spectra of the prepared samples were tested by a microfluorescence spectrometry system (Ocean Optics QE pro). The luminescence properties of studied samples were examined through a fluorescence spectrometer (Edinburgh FS5). The electron paramagnetic resonance (EPR) spectrum of oxygen vacancy was recorded on a Bruker EMXplus A300 spectrometer.

**Table S1.** Calculated lattice parameters of BiOCl, BiOCl:0.005Sm<sup>3+</sup> and BiOCl:0.010Sm<sup>3+</sup> microplates via Rietveld XRD refinement.

| Parameters                 | BiOCl  | BiOCl:0.005Sm <sup>3+</sup> | BiOCl:0.010Sm <sup>3+</sup> |
|----------------------------|--------|-----------------------------|-----------------------------|
| <i>a</i> (Å)               | 3.8928 | 3.8926                      | 3.8916                      |
| <i>b</i> (Å)               | 3.8928 | 3.8926                      | 3.8916                      |
| <i>c</i> (Å)               | 7.3690 | 7.3667                      | 7.3636                      |
| <i>V</i> (Å <sup>3</sup> ) | 111.67 | 111.62                      | 111.52                      |
| $\alpha = \beta = \gamma$  | 90°    | 90°                         | 90°                         |
| <i>R<sub>p</sub></i>       | 0.0867 | 0.0922                      | 0.0846                      |
| <i>R<sub>wp</sub></i>      | 0.1304 | 0.1295                      | 0.1241                      |
| $\chi^2$                   | 1.973  | 2.275                       | 1.922                       |

**Table S2.** *K* values of BiOCl:*x*Sm<sup>3+</sup> microplates under visible light irradiation.

| Compounds                   | <i>K</i> (min <sup>-1</sup> ) |
|-----------------------------|-------------------------------|
| BiOCl                       | 0.00096                       |
| BiOCl:0.003Sm <sup>3+</sup> | 0.00109                       |
| BiOCl:0.005Sm <sup>3+</sup> | 0.00154                       |
| BiOCl:0.008Sm <sup>3+</sup> | 0.00135                       |
| BiOCl:0.010Sm <sup>3+</sup> | 0.00145                       |
| BiOCl:0.030Sm <sup>3+</sup> | 0.00130                       |
| BiOCl:0.050Sm <sup>3+</sup> | 0.00106                       |

**Table S3.** *K* values of BiOCl:Sm<sup>3+</sup>@*y*g-C<sub>3</sub>N<sub>4</sub> heterojunction composites excited by visible light.

| Compounds                                                  | <i>K</i> (min <sup>-1</sup> ) |
|------------------------------------------------------------|-------------------------------|
| g-C <sub>3</sub> N <sub>4</sub>                            | 0.00336                       |
| BiOCl:Sm <sup>3+</sup>                                     | 0.00154                       |
| BiOCl:Sm <sup>3+</sup> @5%g-C <sub>3</sub> N <sub>4</sub>  | 0.00214                       |
| BiOCl:Sm <sup>3+</sup> @10%g-C <sub>3</sub> N <sub>4</sub> | 0.00266                       |
| BiOCl:Sm <sup>3+</sup> @20%g-C <sub>3</sub> N <sub>4</sub> | 0.00379                       |
| BiOCl:Sm <sup>3+</sup> @30%g-C <sub>3</sub> N <sub>4</sub> | 0.00449                       |
| BiOCl:Sm <sup>3+</sup> @40%g-C <sub>3</sub> N <sub>4</sub> | 0.00524                       |
| BiOCl:Sm <sup>3+</sup> @50%g-C <sub>3</sub> N <sub>4</sub> | 0.00568                       |
| BiOCl:Sm <sup>3+</sup> @60%g-C <sub>3</sub> N <sub>4</sub> | 0.00664                       |

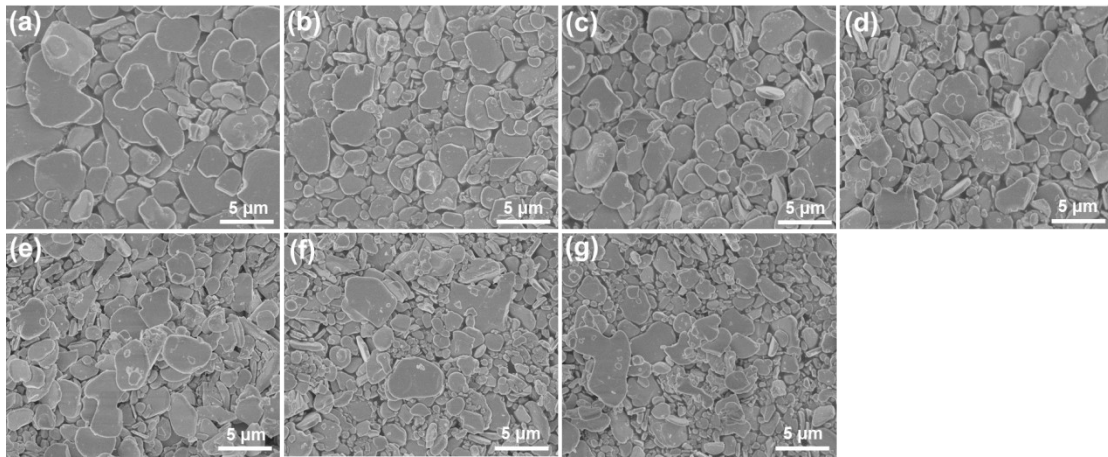

**Figure S1** FE-SEM images  $\text{BiOCl}:x\text{Sm}^{3+}$  compounds with the  $\text{Sm}^{3+}$  contents of (a)  $x = 0.000$ , (b)  $x = 0.003$ , (c)  $x = 0.005$ , (d)  $x = 0.008$ , (e)  $x = 0.010$ , (f)  $x = 0.030$  and (g)  $x = 0.050$ .

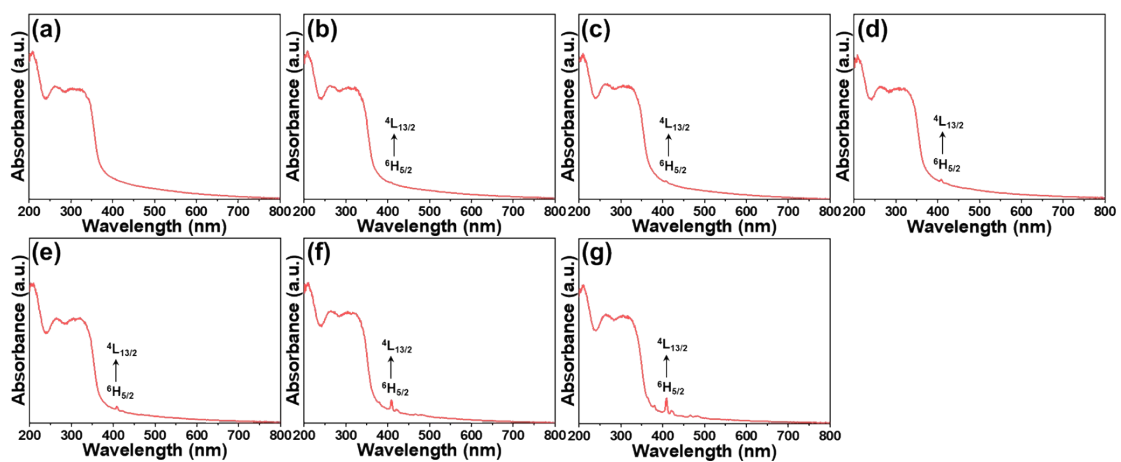

**Figure S2** UV-Vis absorption spectra of BiOCl: $x\text{Sm}^{3+}$  microplates with different  $\text{Sm}^{3+}$  contents of (a)  $x = 0.00$ , (b)  $x = 0.003$ , (c)  $x = 0.005$ , (d)  $x = 0.008$ , (e)  $x = 0.010$ , (f)  $x = 0.030$  and (g)  $x = 0.050$ .

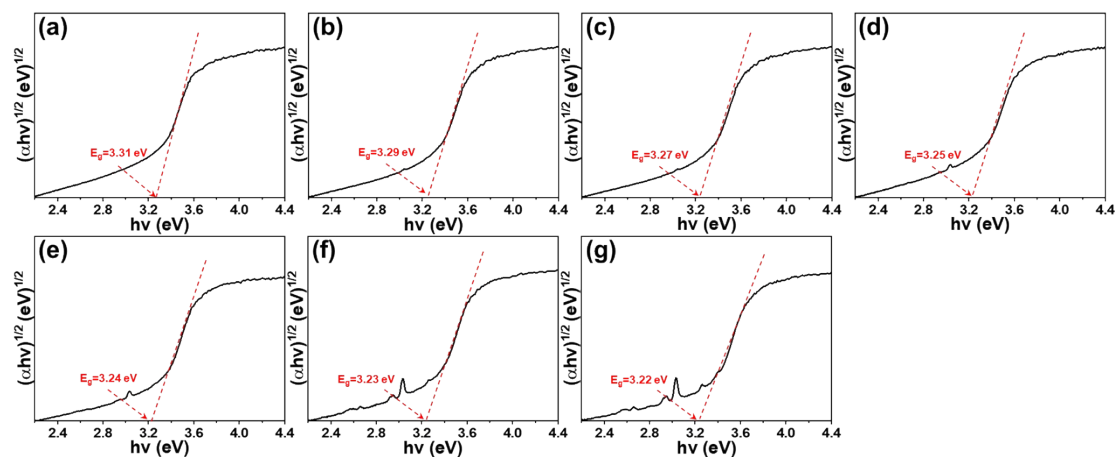

**Figure S3** Evaluation of  $E_g$  values of  $\text{BiOCl}:x\text{Sm}^{3+}$  microplates with different  $\text{Sm}^{3+}$  concentrations of (a)  $x = 0.00$ , (b)  $x = 0.003$ , (c)  $x = 0.005$ , (d)  $x = 0.008$ , (e)  $x = 0.010$ , (f)  $x = 0.030$  and (g)  $x = 0.050$  by Kubelka-Munk function.

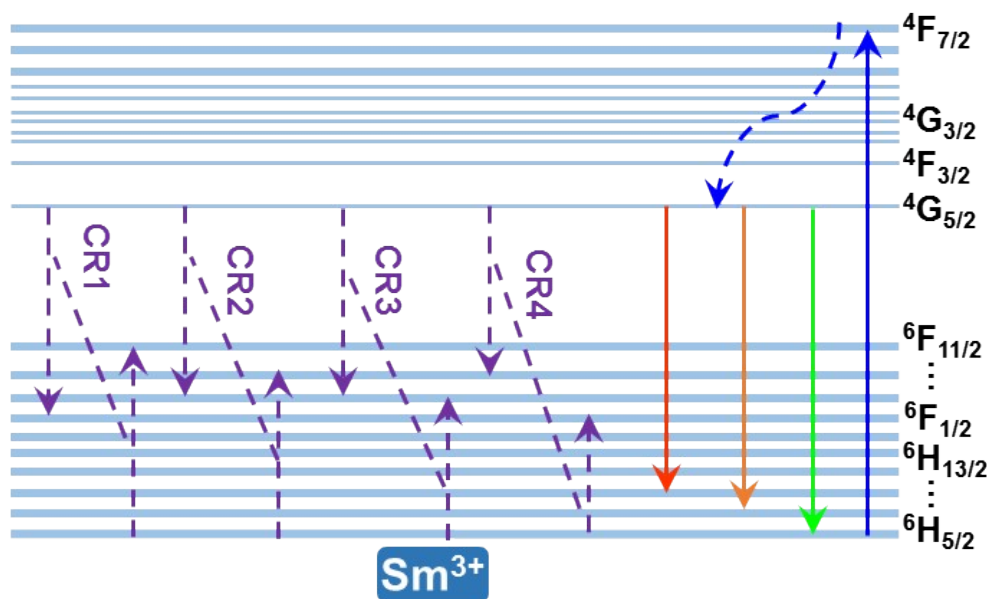

**Figure S4** Energy level diagram of Sm<sup>3+</sup> in BiOCl host lattices.

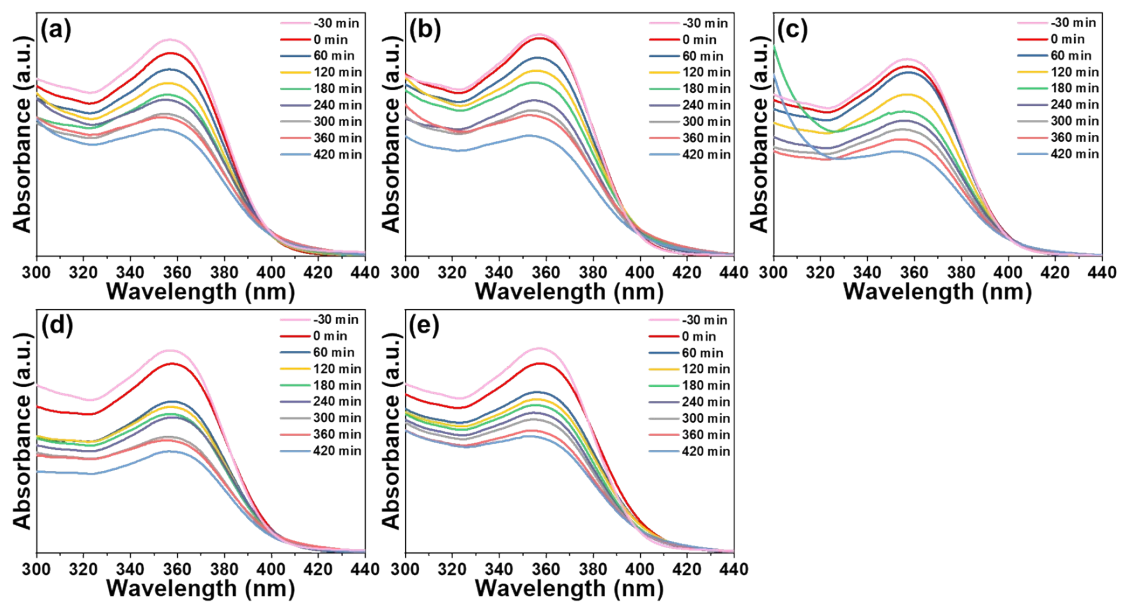

**Figure S5** The UV-vis absorption spectra of TC degradation with  $\text{BiOCl}:x\text{Sm}^{3+}$  microplates doped with different  $\text{Sm}^{3+}$  contents of (a)  $x = 0.003$ , (b)  $x = 0.008$ , (c)  $x = 0.010$ , (d)  $x = 0.030$  and (e)  $x = 0.050$ .



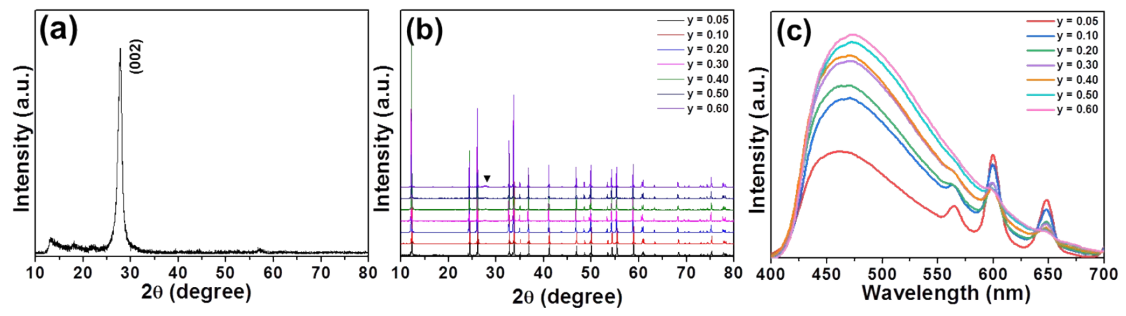

**Figure S6** (a) XRD pattern of the g-C<sub>3</sub>N<sub>4</sub>. (b) XRD patterns and (c) Emission spectra of BiOCl:Sm<sup>3+</sup>@yg-C<sub>3</sub>N<sub>4</sub> heterojunction composites excited at 365 nm.

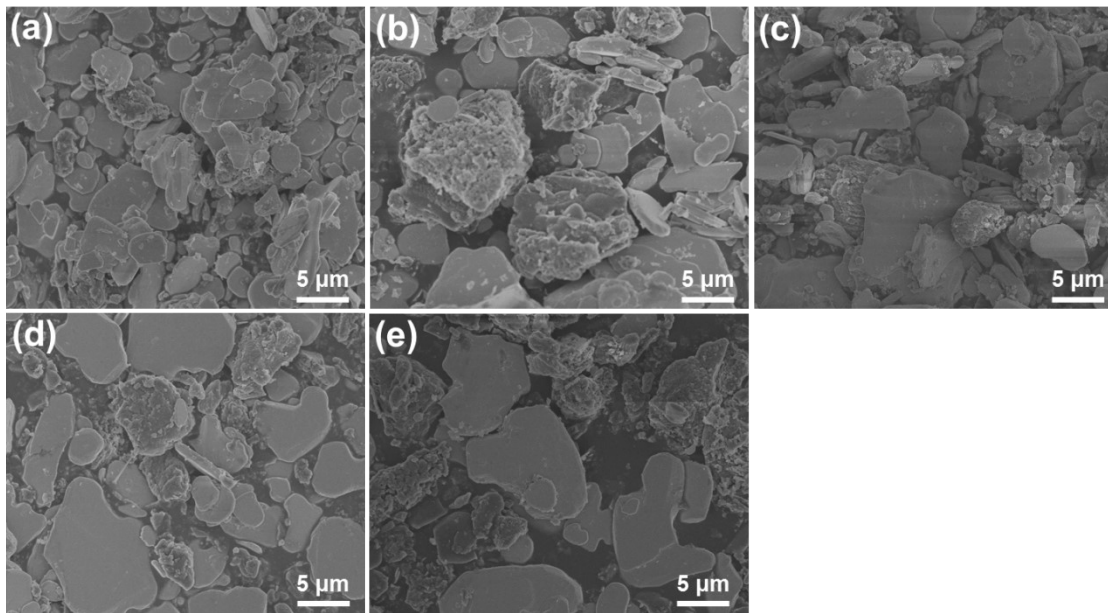

**Figure S7** FE-SEM images of the  $\text{BiOCl}:\text{Sm}^{3+}@y\% \text{C}_3\text{N}_4$  heterojunction composites with different weight percentages of (a)  $y = 10\%$ , (b)  $y = 20\%$ , (c)  $y = 30\%$ , (d)  $y = 40\%$  and (e)  $y = 50\%$ .

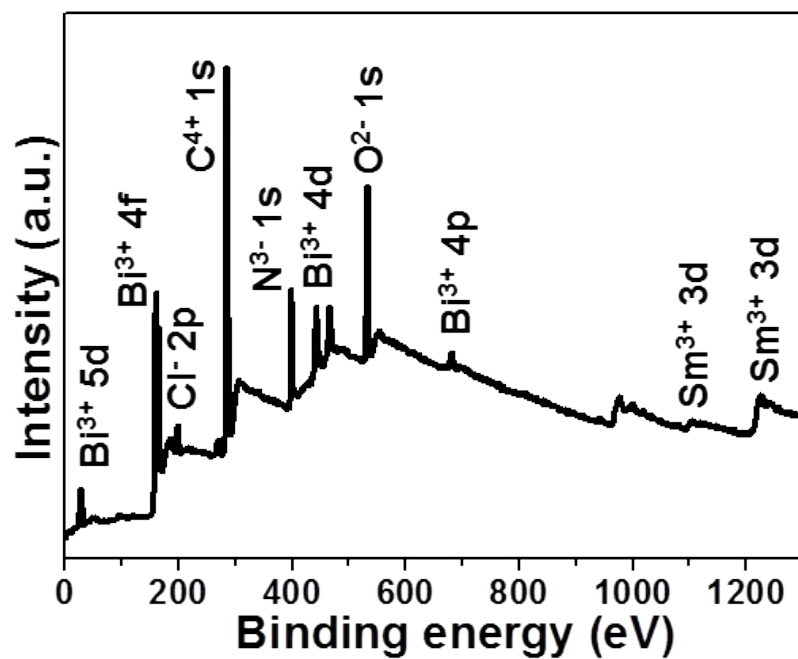

**Figure S8** XPS survey spectrum of BiOCl:Sm<sup>3+</sup>@60%g-C<sub>3</sub>N<sub>4</sub> heterojunction composites.

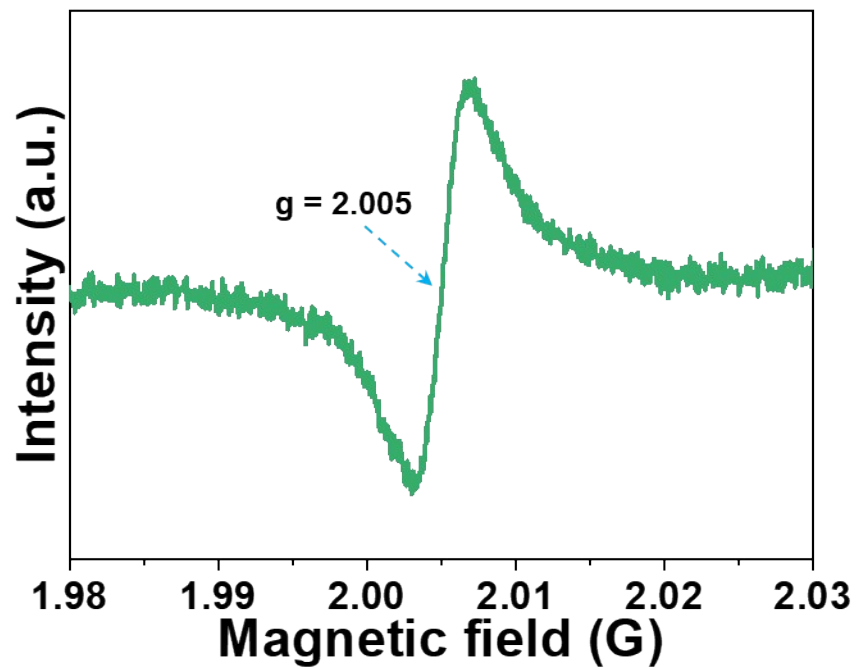

**Figure S9** EPR spectrum of BiOCl:0.010Sm<sup>3+</sup> microplates at room temperature.

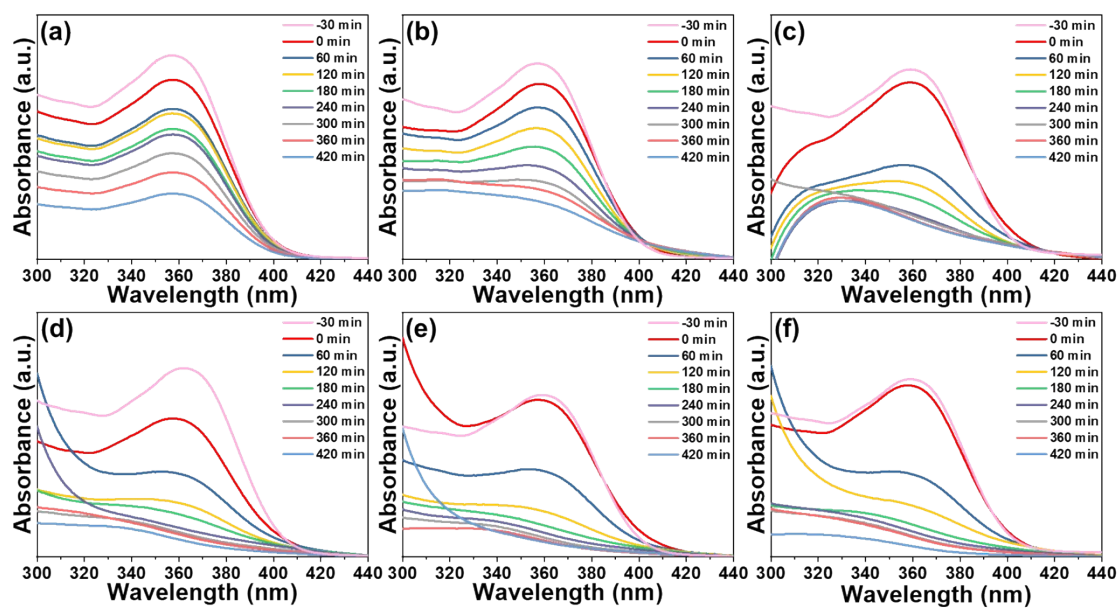

**Figure S10** The UV-vis absorption spectra of TC degradation in the presence of BiOCl:Sm<sup>3+</sup>@y-g-C<sub>3</sub>N<sub>4</sub> heterojunction composites with diverse g-C<sub>3</sub>N<sub>4</sub> contents of (a) y = 5%, (b) y = 10%, (c) y = 20%, (d) y = 30% (e) y = 40%, and (f) y = 50%.

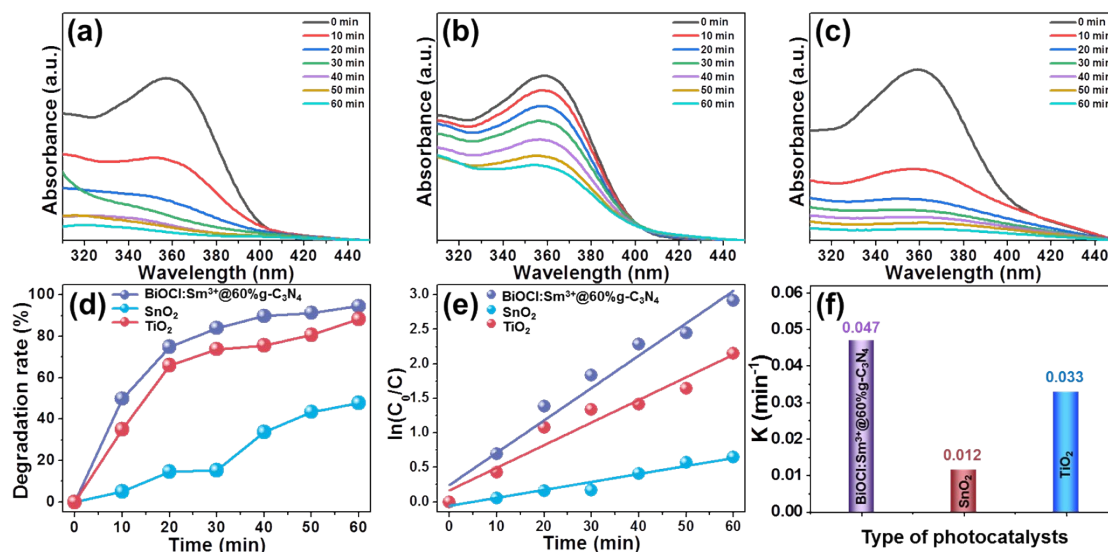

**Figure S11** UV-vis absorption spectra of TC degradation via using (a) commercial  $\text{SnO}_2$  (b) commercial  $\text{TiO}_2$  and (c)  $\text{BiOCl:Sm}^{3+}@60\%g\text{-C}_3\text{N}_4$  heterojunction composites. (d) Degradation rates of TC by commercial  $\text{SnO}_2$ ,  $\text{TiO}_2$  and  $\text{BiOCl:Sm}^{3+}@60\%g\text{-C}_3\text{N}_4$  heterojunction composites under full-spectrum light irradiation. (e) Plots of the  $\ln(C_0/C)$  versus time  $t$  for the related photocatalysts. (f) Kinetic rates of TC degradation via using the related photocatalysts under full-spectrum light irradiation.

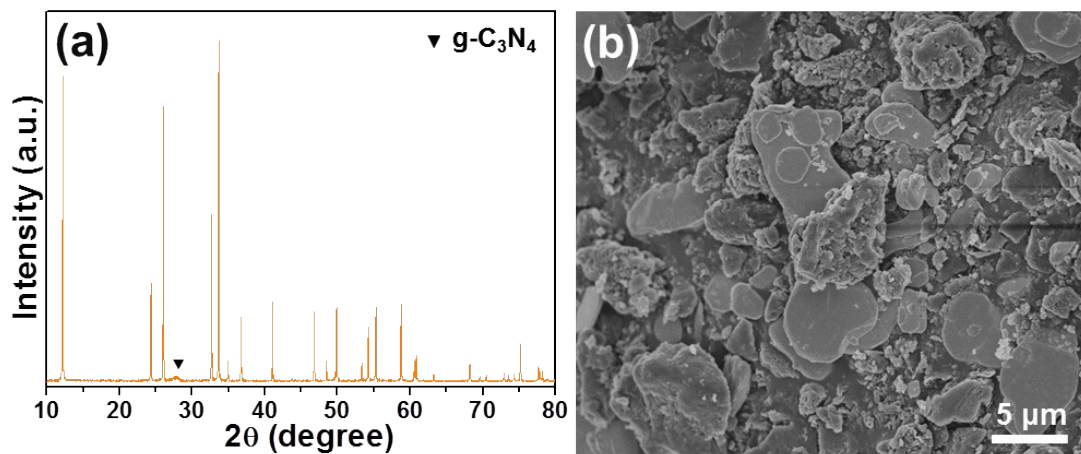

**Figure S12** (a) XRD pattern and (b) FE-SEM image of BiOCl:Sm<sup>3+</sup>@60%g-C<sub>3</sub>N<sub>4</sub> heterojunction composites after cyclic experiment.

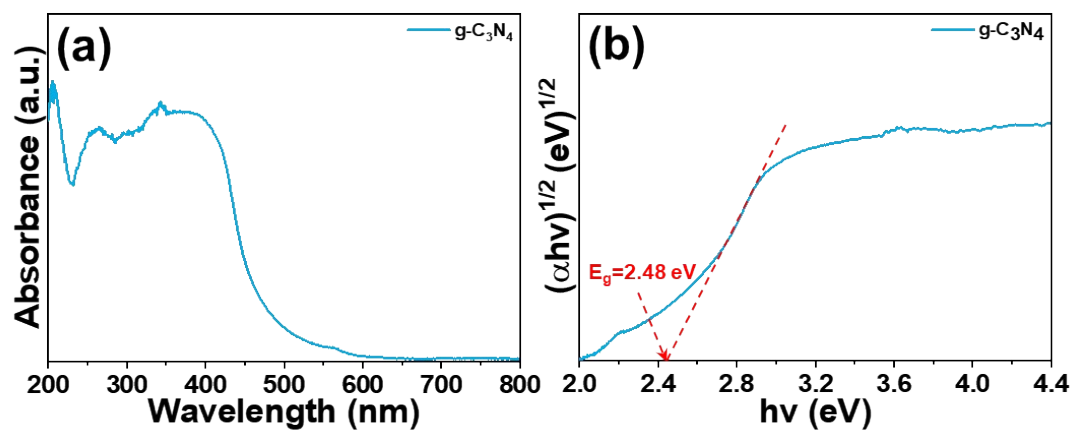

**Figure S13** (a) UV-vis absorption spectrum of g-C<sub>3</sub>N<sub>4</sub>. (b) Evaluation of  $E_g$  values of g-C<sub>3</sub>N<sub>4</sub> by Kubelka-Munk function.



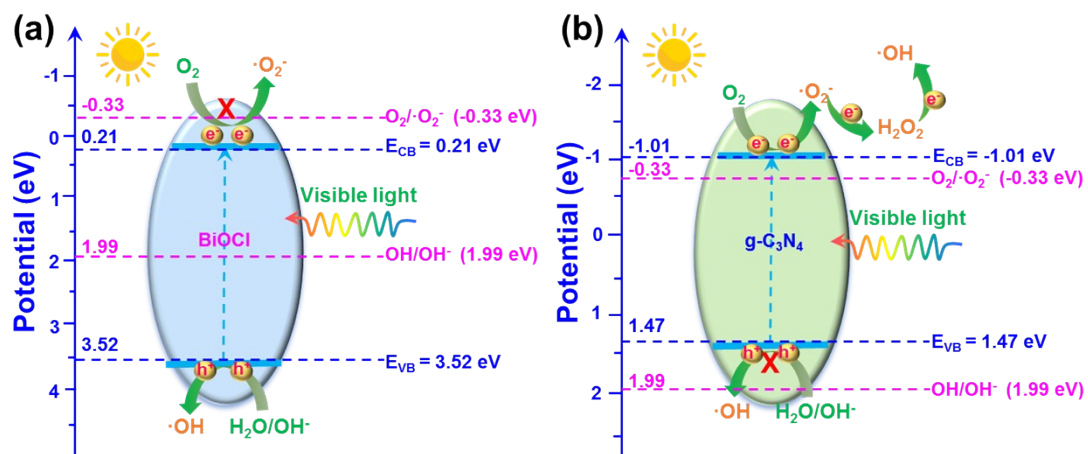

**Figure S14** Band positions of (a) BiOCl and (b) g-C<sub>3</sub>N<sub>4</sub>.

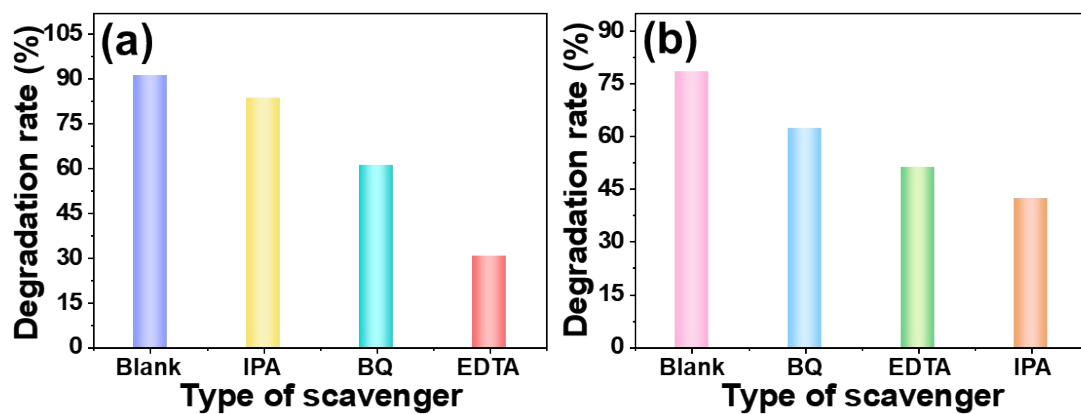

**Figure S15** Trapping experiments of the active species for TC degradation by utilizing of (a) BiOCl:0.005Sm<sup>3+</sup> microplates and (b) g-C<sub>3</sub>N<sub>4</sub>.
